# Supplementary material
Source: Royal Society of Chemistry journal article supplement (doi:10.1039/d6ja00173d)
Supplement: d6ja00173d1.pdf [file d6ja00173d1.pdf]

# Process-accompanying analysis of solid intermediate and end products in the manufacturing process of high-purity tungsten by ETV-ICP-OES

Dina Friebel<sup>a</sup>, Thomas Vogt<sup>a</sup>, Carla Vogt<sup>a</sup>

<sup>a</sup> Institute of Analytical Chemistry, TU Bergakademie Freiberg, Leipziger Str. 29, 09599 Freiberg, Germany

Corresponding author: Thomas Vogt  
TU Bergakademie Freiberg  
Institute of Analytical Chemistry  
Leipziger Str. 29  
09599 Freiberg  
Germany  
E-mail address: Thomas.Vogt@chemie.tu-freiberg.de  
Phone number: +49 3731 392335  
Co-author E-mail addresses: Dina.Friebel@extern.tu-freiberg.de; Carla.Vogt@chemie.tu-freiberg.de

## Electronic supplementary information (ESI)

### Table of contents

|                                                                           |   |
|---------------------------------------------------------------------------|---|
| Part I – Wavelength vs. intensity plots for all elements and sample types | 2 |
| Part II – Time vs. intensity plots for all elements and sample types      | 3 |
| Part III – Additional SEM-images of selected samples                      | 4 |
| Part IV – Calibration curves obtained by standard addition                | 5 |

## Part I – Wavelength vs. intensity plots for all elements and sample types

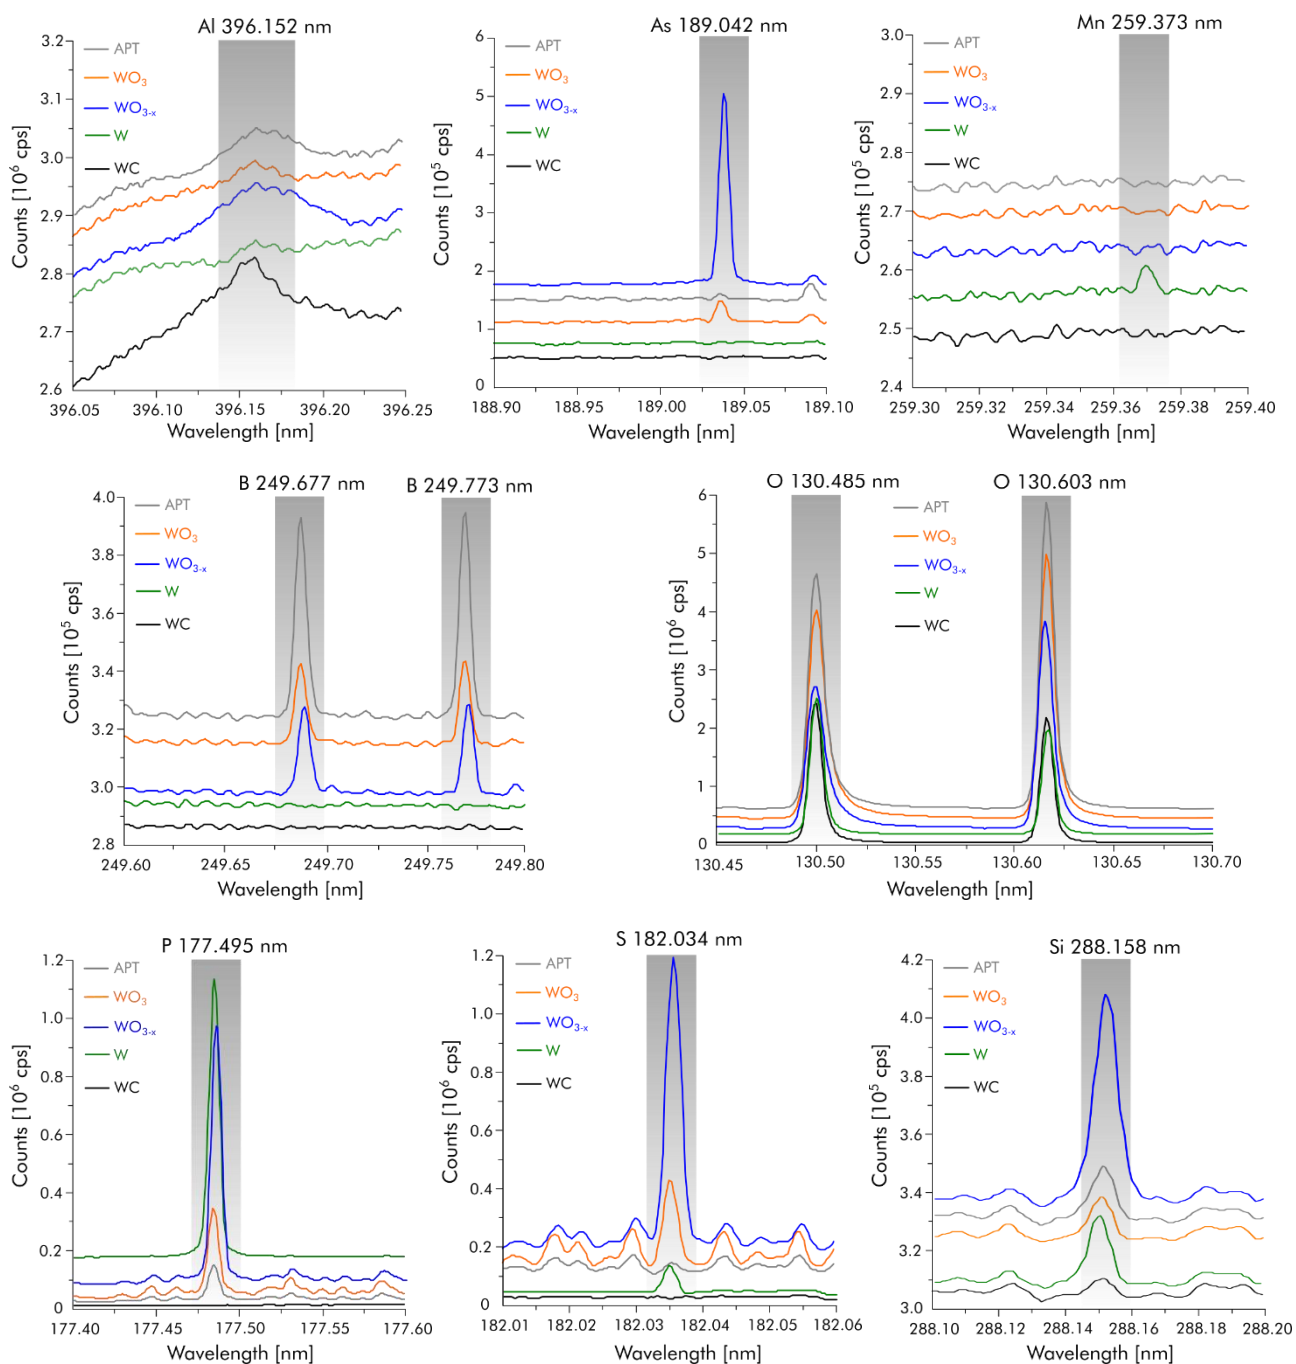

Figure S.1: Stacked full spectra for the selected elements, using samples of APT,  $\text{WO}_3$ ,  $\text{WO}_{3-x}$ , W, WC, (using 15 mg of APT, W and W and 25 mg of  $\text{WO}_3$  and  $\text{WO}_{3-x}$ )\*

\*Note from the authors: The full spectra are intended for background correction and the selection of specific emission lines. To obtain sharp peaks for this purpose, the temperature program used a higher heating rate, and the integration range was comparatively long (longer than that presented in S.2). Consequently, analytes with low concentrations, such as Al and Mn, may exhibit a low signal-to-noise ratio, resulting in less intense peaks. For these elements, the detector range settings and background correction were applied using liquid standard solutions.

## Part II – Time vs. intensity plots for all elements and sample types

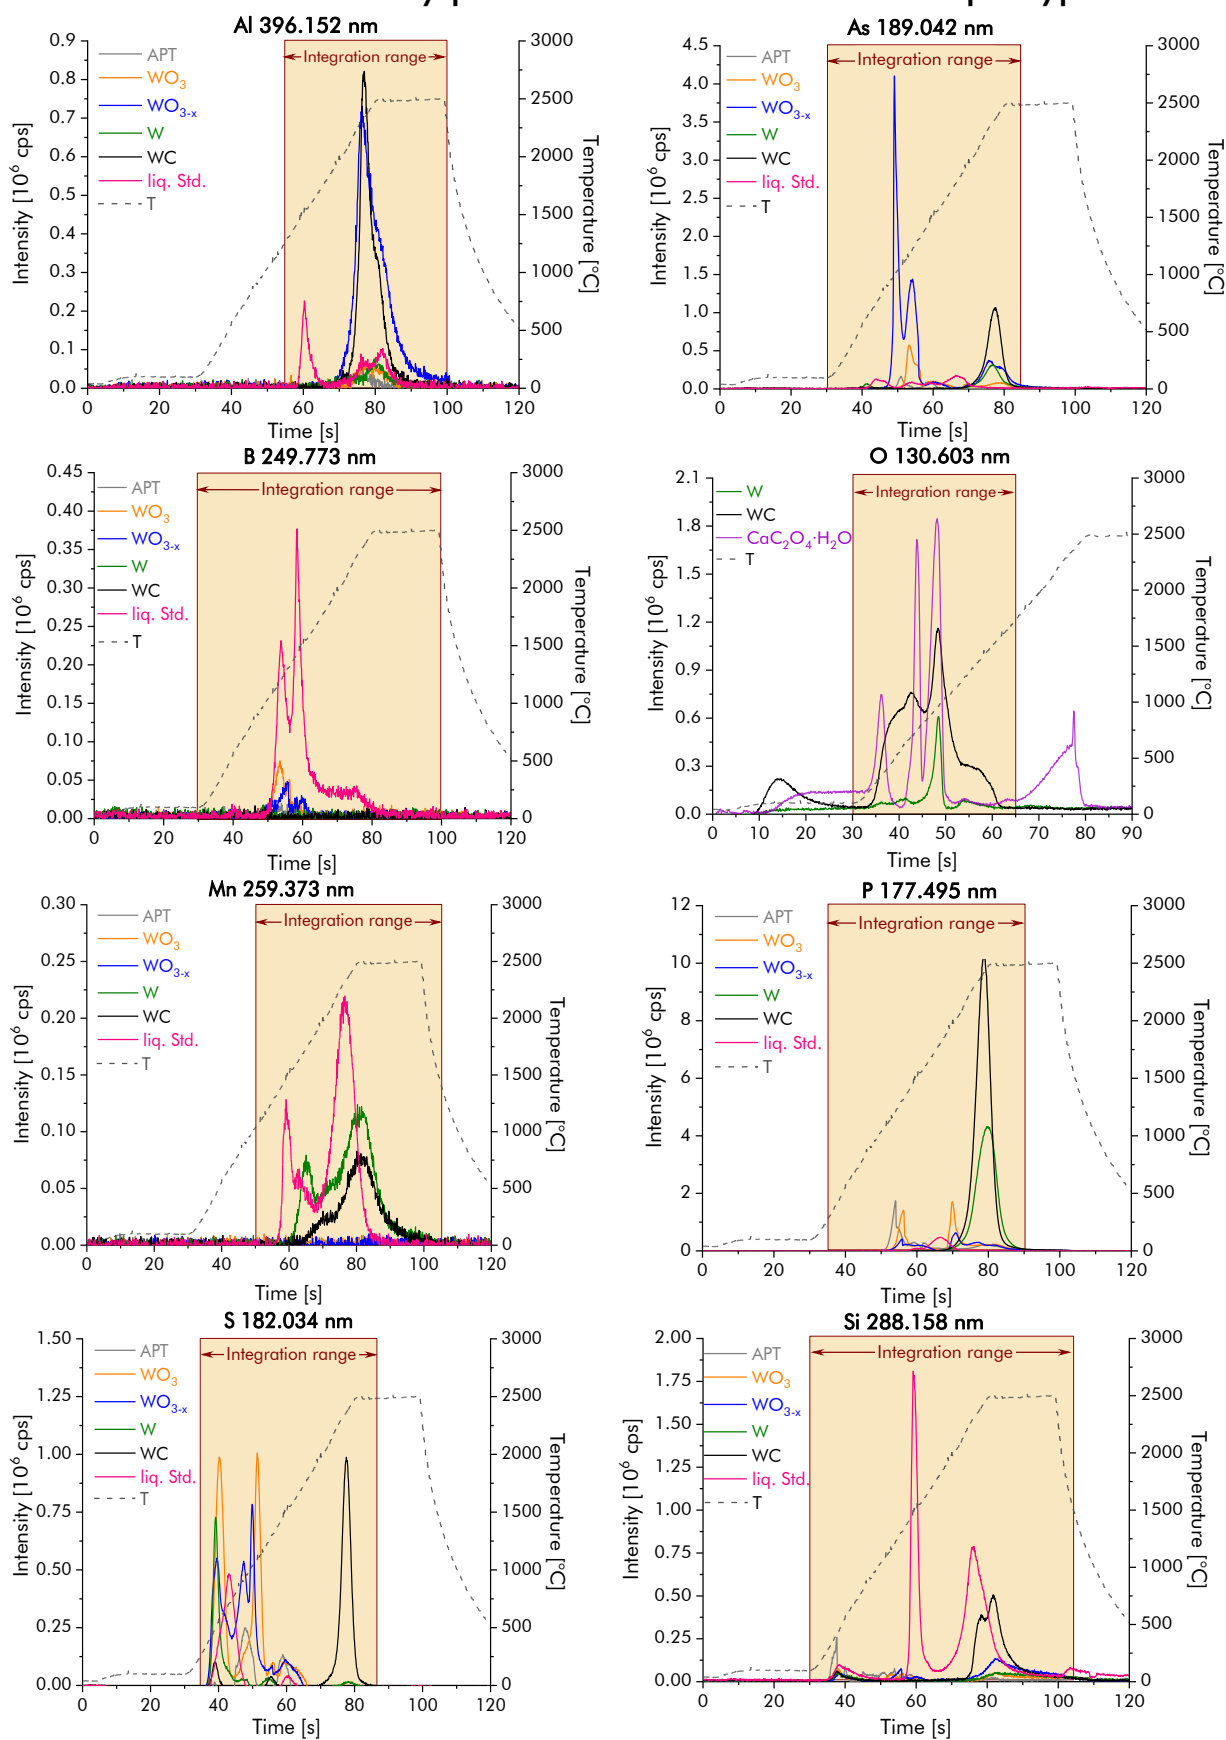

Figure S.2: Integration ranges for the selected elements, using samples of APT, WO<sub>3</sub>, WO<sub>3-x</sub>, W, WC, (using 15 mg each) as well as 2 μL of the prepared 10 ppm multi-element liquid standard and 0.25 mg of CaC<sub>2</sub>O<sub>4</sub>·H<sub>2</sub>O

Part III – Additional SEM-images of selected samples

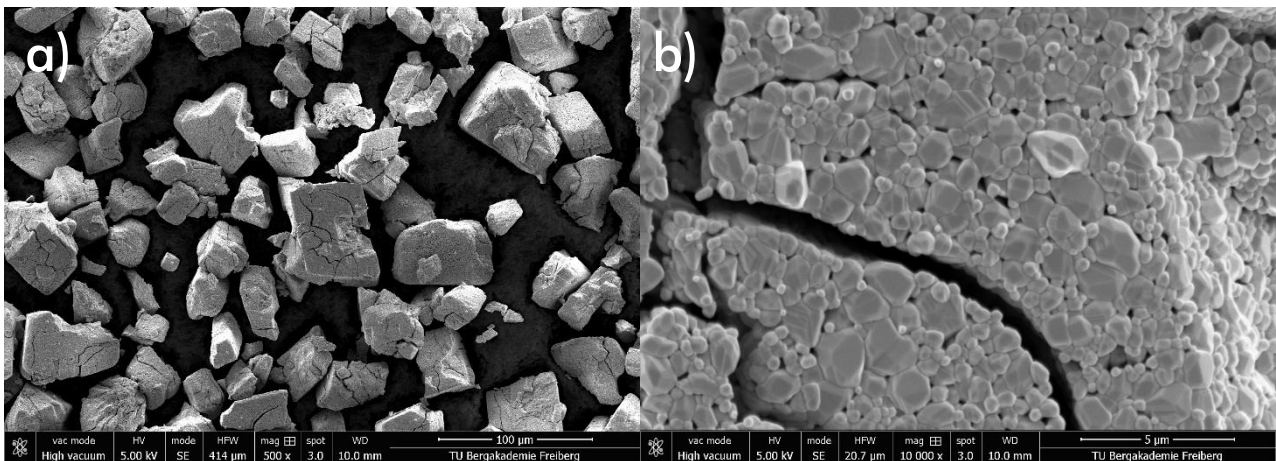

Figure S.3.1: SEM images of an original sample of  $WO_3$  before treatment (SE mode, a) magnitude 500x b) magnitude 10000x)

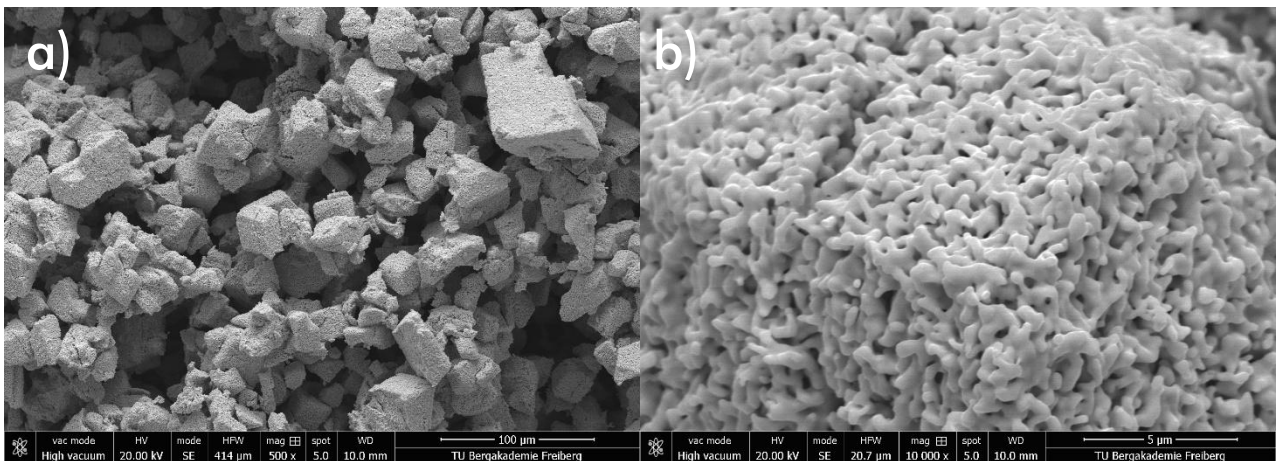

Figure S.3.2: SEM images of  $WO_3$  after being heated to 2400 °C using  $H_2$  as a modifier gas (SE mode, a) magnitude 500x b) magnitude 10000x)

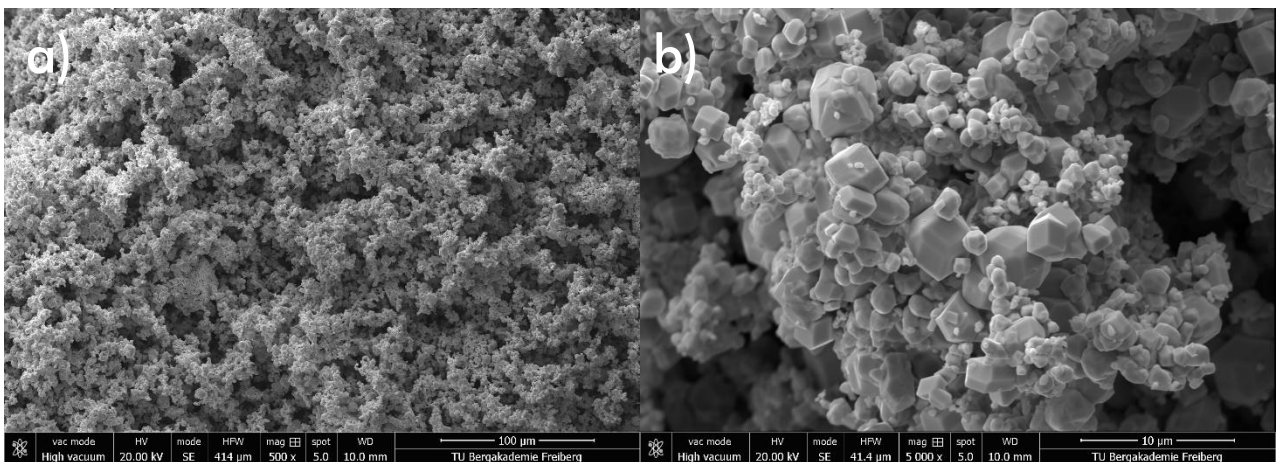

Figure S.3.3: SEM images of metallic tungsten powder after being heated to 2400 °C using  $H_2$  as a modifier gas (SE mode, a) magnitude 500x b) magnitude 5000x)

### Part IV – Calibration curves obtained by standard addition

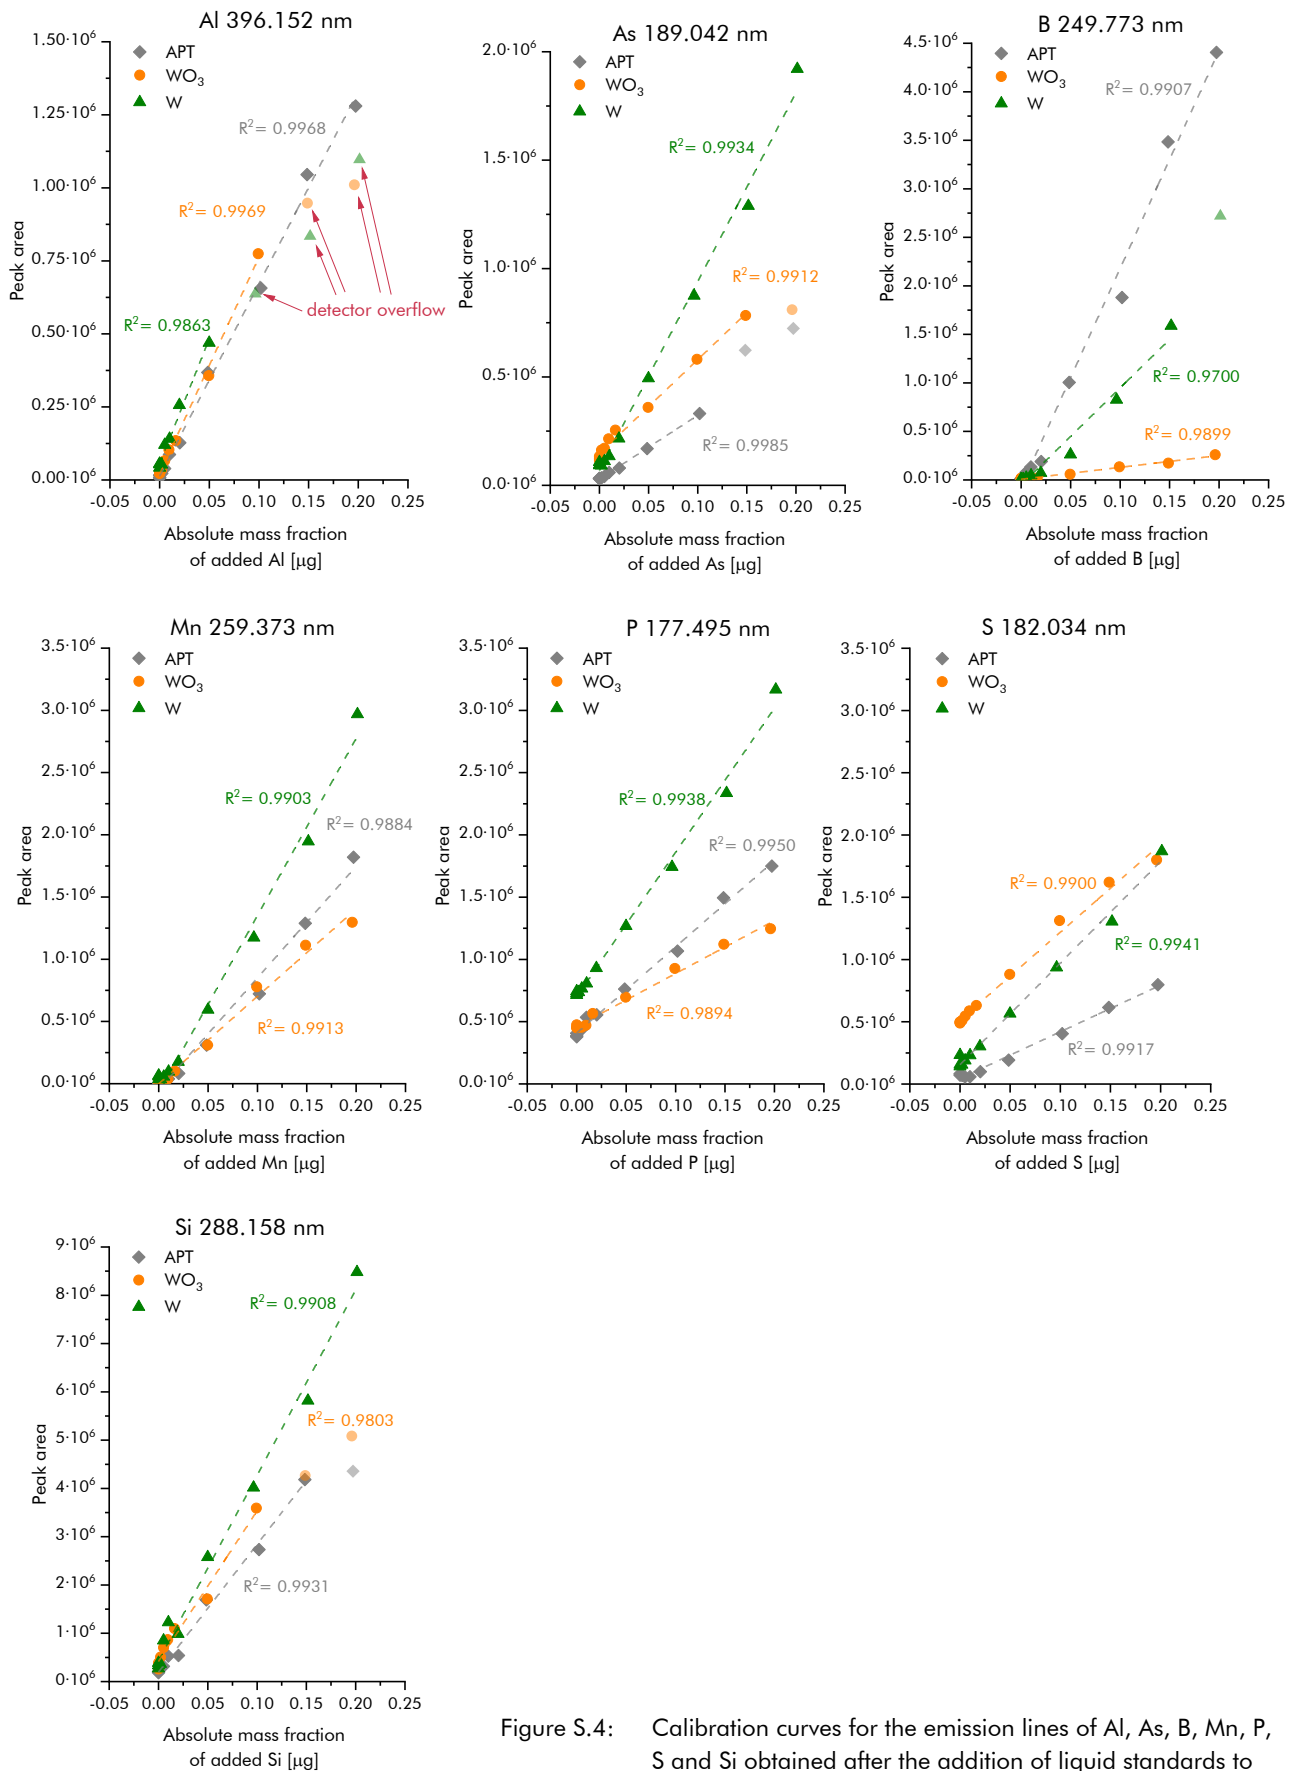

Figure S.4: Calibration curves for the emission lines of Al, As, B, Mn, P, S and Si obtained after the addition of liquid standards to selected samples of APT, WO<sub>3</sub> and W
